# Supplementary material for: Association of serum Metrnl levels and high-density lipoprotein cholesterol in patients with type 2 diabetes mellitus: a cross-sectional study
Source: PeerJ. 2024 Oct 14;12:e18264. doi: 10.7717/peerj.18264 (PMC11485050; doi:10.7717/peerj.18264)
Supplement: Supplemental Information 2 — The clinical indicators of each patient. The items with suffix A are the categorical items. The raw data showed a positive correlation between serum Metrnl level and HDL-C in all patients, which persisted after regression analysis. [file peerj-12-18264-s002.xlsx]

## Sheet: raw data of metrnl
metrnl concentration	age	Diabetes Duration(years)	systolic blood pressure（SBP）	diastolic blood pressure (DBP)	weight	height	BMI	waistline	hipline	WHR	blood glucose	PBG	2hPG	2hINS	Fasting C-peptide(FCP)	2hCP	HbA1c	TC	TG	HDL	LDL	tertiles of metrnl	sex（male 1，female2）	HOMAIR_A	TC_A	TG_A	HDL_A	LDL_A
35.1271	50	1	109	77	78	1.75	25.4694	96	98	0.979592	7.56	9.3	9.3	19.98	4.15	5.72	0.08	2.89	1.28	1.39	1.21	2	1	1	0	0	1	0
25.9446	54	7	123	82	55	1.6	21.4844	78	90	0.866667	11.61	18.16	18.16	21.51	2.12	4.17	0.127	3.67	1.6	0.98	2.17	1	1	1	0	0	0	0
40.7996	56	3	155	89	64	1.66	23.2254	87	93	0.935484	9.45	13.22	13.22	57.58	3.25	9.37	0.075	4.83	1.37	1.2	2.91	3	1	1	1	0	1	1
27.2643	65	3	117	77	47	1.6	18.3594	71	81	0.876543	9.85	23.33	23.33	7.64	1.57	3.52	0.056	3.72	0.87	1.27	2.32	1	1	1	0	0	1	0
33.1637	66	0	123	83	74	1.73	24.7252	93	101	0.920792	11.56	17.32	17.32	49.92	2.06	4.7	0.13	4.53	2.02	1.27	2.7	2	1	1	1	1	1	1
37.5307	60	5	172	98	57	1.55	23.7253	89	97	0.917526	8.21	13.95	13.95	53.5	3.74	9.46	0.082	5.43	3.05	1.2	3.16	2	2	1	1	1	1	1
39.6876	58	10	156	91	53	1.58	21.2306	80	86	0.930233	9.56	11.97	11.97	8.83	1.76	3.19	0.095	5.01	0.91	1.55	#NULL!	3	1	1	1	0	1	#NULL!
203.1	56	1	120	82	67	1.7	23.1834	90	96	0.9375	5.46	9.27	9.27	44.66	2.64	8.01	0.059	4.03	0.8	1.05	2.69	3	1	1	0	0	1	1
40.0558	82	8	175	95	65	1.75	21.2245	#NULL!	#NULL!	#NULL!	8.6	20.44	20.44	40.01	0.855	2.52	0.121	3.61	1.17	0.93	2.09	3	1	0	0	0	0	0
25.1825	73	10	147	69	77	1.68	27.2817	95	104	0.913462	6.76	12	12	55.72	3.73	6.84	0.07	4.3	1.73	0.98	2.49	1	1	1	0	1	0	0
24.6869	64	15	155	70	81	1.75	26.449	95	105	0.904762	7.22	9.46	9.46	21.7	2.02	5.72	0.075	4.03	1.13	0.87	2.71	1	1	1	0	0	0	1
27.8096	72	10	146	88	81	1.72	27.3797	95	102	0.931373	8.55	11.92	11.92	33.07	4.34	6.76	0.087	3	1.77	1.3	1.29	1	1	1	0	1	1	0
30.986	67	1	143	77	49	1.62	18.6709	#NULL!	#NULL!	#NULL!	5.1	6.67	6.67	30.37	2.08	6.84	0.061	4.72	0.98	1.55	2.7	1	2	1	1	0	1	1
36.1423	51	0	123	85	69	1.68	24.4473	92	94	0.978723	8.72	20.93	20.93	27.09	2.34	4.94	0.097	4.4	0.85	0.8	3.07	2	1	1	0	0	0	1
47.5228	61	7	110	72	45	1.52	19.4771	76	90	0.844444	14.41	#NULL!	#NULL!	#NULL!	#NULL!	#NULL!	0.122	5.18	2.47	2.65	2.29	3	2	0	1	1	1	0
32.5291	67	0.083	96	68	#NULL!	#NULL!	#NULL!	#NULL!	#NULL!	#NULL!	7.2	8.85	8.85	7.16	1.68	2.54	0.091	5.14	0.99	1.31	3.49	2	1	0	1	0	1	1
315.205	44	4	106	71	58	1.65	21.3039	#NULL!	#NULL!	#NULL!	5.93	4.52	4.52	12.03	1.16	0.653	0.06	2.81	0.73	1.32	1.54	3	1	1	0	0	1	0
34.1342	71	0	129	83	55	1.63	20.7008	89	89	1	8.35	18.92	18.92	43.54	0.858	1.69	0.159	3.86	0.77	1.17	2.18	2	1	0	0	0	1	0
42.317	65	10	137	75	57	1.63	21.4536	84	91	0.923077	9.18	10.8	10.8	69.36	0.828	1.8	0.091	2.98	0.78	1.23	1.43	3	1	1	0	0	1	0
50.4997	69	3	134	82	#NULL!	#NULL!	#NULL!	#NULL!	#NULL!	#NULL!	6.01	9.49	9.49	81.93	3.77	14.22	0.07	4.35	1.24	0.99	2.5	3	1	1	0	0	0	0
31.5958	39	0	145	93	75	1.7	25.9516	94	98	0.959184	9.02	12.16	12.16	22.39	3.82	7.17	0.082	6.18	4.39	1.2	3.32	2	1	1	1	1	1	1
32.8452	58	5	120	80	69	1.6	26.9531	91	95	0.957895	6.83	7.88	7.88	27.18	2.73	5.84	0.07	3.8	0.93	1.35	1.87	2	1	1	0	0	1	0
26.2036	69	5	147	81	65	1.69	22.7583	87	98	0.887755	5.14	7.41	7.41	20.66	3.29	5.43	0.071	2.43	1.55	0.93	0.86	1	1	1	0	0	0	0
32.5291	66	0	112	74	50	1.64	18.5901	#NULL!	#NULL!	#NULL!	5.06	12.11	12.11	21.45	1.14	8.03	0.058	4.86	1.24	1.73	2.59	2	1	0	1	0	1	0
30.986	58	0.166	142	85	60	1.7	20.7612	82	88	0.931818	5.51	14.32	14.32	120.9	1.18	14.65	0.073	3.72	0.84	1.03	2.11	1	1	0	0	0	0	0
31.2897	39	3	118	64	64	1.74	21.1389	85	92	0.923913	10.61	14.3	14.3	24.08	1.46	1.4	0.123	6.07	6.62	0.78	2.01	1	1	1	1	1	0	0
41.1753	53	5	172	105	101	1.72	34.1401	111	113	0.982301	10.29	11.19	11.19	16.46	2.99	4.56	0.094	4.05	2.83	0.81	2.04	3	1	1	0	1	0	0
41.934	40	0.083	113	77	84	1.7	29.0657	103	98	1.05102	5.92	10.98	10.98	150.7	4.07	17.12	0.061	5.61	4.68	1.01	2.83	3	1	1	1	1	0	1
44.6676	62	2	111	74	83	1.78	26.1962	92	96	0.958333	7.87	12.36	12.36	26.11	3.65	7.45	0.079	3.06	3.85	0.88	1.09	3	1	1	0	1	0	0
25.4341	73	8	135	81	#NULL!	#NULL!	#NULL!	88	98	0.897959	11.94	12.87	12.87	44.93	7.26	6.7	0.076	5.2	3.6	0.96	3.08	1	1	1	1	1	0	1
82.7637	46	8	94	59	41	1.55	17.0656	68	80	0.85	8.9	15.93	15.93	22.68	0.77	1.82	0.098	4.45	0.66	1.8	2.22	3	2	1	0	0	1	0
225.095	69	5	149	79	66	1.74	21.7994	#NULL!	#NULL!	#NULL!	5.99	14.79	14.79	24.04	4.79	6.14	0.055	#NULL!	#NULL!	#NULL!	#NULL!	3	1	1	0	0	1	0
40.0558	46	0	135	95	60	1.6	23.4375	78	91	0.857143	17.63	22.3	22.3	23.65	1.41	1.45	0.133	8.79	11.7	0.87	4.77	3	1	1	1	1	0	1
34.1342	48	3	102	69	55	1.6	21.4844	84	91	0.923077	34.49	22.45	22.45	96.68	2.15	4.31	0.112	3.37	5.2	0.6	0.8	2	1	1	0	1	0	0
38.2397	56	10	122	78	#NULL!	#NULL!	#NULL!	79	84	0.940476	8.72	6.67	6.67	1.48	0.46	0.31	0.146	4.93	1.94	1.01	2.56	3	1	0	1	1	0	0
378.241	37	0	106	68	74	1.7	25.6055	#NULL!	#NULL!	#NULL!	21.93	32.47	32.47	18.27	0.79	0.63	0.072	6.38	2.86	1.08	3.59	3	1	1	1	1	1	1
37.5307	72	20	170	81	84	1.7	29.0657	94	99	0.949495	9.274	17	17	41.41	4.38	9.2	0.083	4.69	4.79	0.86	1.39	2	1	1	1	1	0	0
37.884	44	15	130	96	72	1.7	24.9135	99	106	0.933962	8.65	14.82	14.82	33.62	3.7	8.78	0.082	5.11	6.19	0.93	1.77	3	1	1	1	1	0	0
30.0899	53	3	153	101	79	1.7	27.3356	#NULL!	#NULL!	#NULL!	13.2	14.02	14.02	29.17	3.94	4.77	0.084	5.48	14.29	0.72	1.31	1	1	1	1	1	0	0
33.1637	52	7	116	81	62.5	1.62	23.815	89	94	0.946809	7.9	19.18	19.18	12.6	0.49	2.93	0.148	5.34	1.68	1.06	3.47	2	1	0	1	0	1	1
33.4847	44	15	108	76	64	1.7	22.1453	89	90	0.988889	11.47	13.73	13.73	54.71	0.99	1.65	0.122	4.33	3.15	0.83	2.03	2	1	1	0	1	0	0
30.986	49	11	109	73	51	1.6	19.9219	79	90	0.877778	13.29	16.15	16.15	31.55	0.88	1.47	0.132	4.71	3.23	0.85	2.13	1	2	1	1	1	0	0
53.5981	60	7	132	81	52	1.65	19.1001	84	91	0.923077	11.43	18.59	18.59	38.4	2.87	7.33	0.085	6.34	6.05	0.7	3.46	3	2	1	1	1	0	1
49.6367	61	10	138	96	50	1.67	17.9282	73	83	0.879518	7.42	13.9	13.9	20.55	1.17	6.87	0.075	2.06	0.5	1.28	0.7	3	1	0	0	0	1	0
28.6461	54	10	121	83	75	1.75	24.4898	95	100	0.95	12.59	20.5	20.5	9.22	1.72	3.08	0.101	8.62	17.92	0.57	0.63	1	1	1	1	1	0	0
43.0906	68	10	115	72	50	1.5	22.2222	#NULL!	#NULL!	#NULL!	4.62	14.48	14.48	6.43	0.25	1.61	0.11	3.64	0.81	1.31	1.98	3	2	0	0	0	1	0
30.6848	61	15	146	84	69	1.75	22.5306	93	98	0.94898	10.02	16.52	16.52	16.72	1.68	4.86	0.085	5.06	3.02	0.99	2.93	1	1	1	1	1	0	1
31.5958	70	6	120	73	54	1.53	23.0681	91	94	0.968085	13.5	24.76	24.76	5.78	1.63	2.86	0.139	3.61	2.19	0.77	1.89	2	2	1	0	1	0	0
19.8901	29	2	113	82	65	1.65	23.8751	85	95	0.894737	13.37	18.17	18.17	29.27	3.6	4.95	#NULL!	5.25	3.36	0.74	3.45	1	1	1	1	1	0	1
30.6848	35	13	104	73	84	1.8	25.9259	#NULL!	#NULL!	#NULL!	10.3	13.06	13.06	26.83	4.85	6.81	0.09	6.93	14.8	0.66	1.51	1	1	1	1	1	0	0
35.463	49	9	140	87	72	1.72	24.3375	#NULL!	#NULL!	#NULL!	7.31	9.58	9.58	#NULL!	2.77	3.7	0.074	5.49	1.37	1.09	3.63	2	1	#NULL!	1	0	1	1
35.463	44	0	119	76	61.5	1.7	21.2803	85	95	0.894737	10.61	16.08	16.08	14.42	0.59	0.56	0.099	4.99	0.9	1.21	3.41	2	1	1	1	0	1	1
33.1637	71	0	164	73	88	1.8	27.1605	101	108	0.935185	6.62	12.32	12.32	19.15	3.55	4.79	#NULL!	4.26	1.76	0.92	2.72	2	1	1	0	1	0	1
32.8452	48	14	107	74	74.5	1.68	26.396	88	86	1.02326	13.59	15.29	15.29	#NULL!	2.16	2.55	0.113	4.51	1.09	1.18	2.96	2	1	#NULL!	1	0	1	1
30.0899	47	1	128	88	75	1.7	25.9516	#NULL!	#NULL!	#NULL!	5.28	#NULL!	#NULL!	#NULL!	4.16	#NULL!	0.056	4.37	1.26	1.05	2.84	1	1	1	0	0	1	1
28.6461	47	4	112	72	72	1.7	24.9135	91	94	0.968085	10.75	12.31	12.31	7.9	1.78	2.26	0.118	5.02	12.24	1.28	1.5	1	1	1	1	1	1	0
36.1423	51	11	147	90	63	1.6	24.6094	#NULL!	#NULL!	#NULL!	8.04	12.67	12.67	65.49	3.71	10.15	0.067	3.19	1.47	1.23	1.73	2	1	1	0	0	1	0
346.622	70	4	149	78	54	1.72	18.2531	71	88	0.806818	7.31	5.91	5.91	35.04	1.25	6.54	0.086	3.58	0.49	2.13	1.54	3	1	0	0	0	1	0
35.1271	56	6	133	75	50	1.54	21.0828	#NULL!	#NULL!	#NULL!	6.19	5.66	5.66	1.76	1.13	1.09	0.072	3.51	0.38	1.54	1.75	2	1	0	0	0	1	0
31.2897	45	6	146	100	85	1.76	27.4406	#NULL!	#NULL!	#NULL!	6.46	13.28	13.28	133.6	4.17	17.44	0.066	4.13	3.41	1.17	1.98	1	1	1	0	1	1	0
29.7962	58	5	115	76	67.5	1.7	23.3564	89	92	0.967391	8.9	13.97	13.97	57.98	2.27	5.21	0.091	4.65	7.14	0.79	1.32	1	1	1	1	1	0	0
30.0899	43	4	113	77	68	1.67	24.3824	92	93	0.989247	9.87	15.5	15.5	#NULL!	1.24	#NULL!	0.115	4.52	3.61	0.8	2.38	1	1	#NULL!	1	1	0	0
28.6461	43	3	146	100	61	1.54	25.721	94	91	1.03297	8.7	13.23	13.23	#NULL!	1.98	4.27	0.093	6.97	2.35	1.17	4.81	1	2	#NULL!	1	1	1	1
31.2897	74	23	155	70	85	1.75	27.7551	100	105	0.952381	9.49	14.39	14.39	45.95	1.95	5.38	0.073	2.79	0.76	0.78	1.67	1	1	1	0	0	0	0
45.8764	60	7	109	71	74.5	1.68	26.396	#NULL!	#NULL!	#NULL!	6.05	7.08	7.08	12.28	1.09	3.38	#NULL!	4.3	1.06	1.09	2.74	3	1	0	0	0	1	1
34.1342	59	2	155	75	61.5	#NULL!	#NULL!	#NULL!	#NULL!	#NULL!	5.64	8.45	8.45	26.58	1.34	4.01	0.062	3.41	0.85	0.89	1.99	2	1	0	0	0	0	0
127.884	34	5	147	100	88	1.64	32.7186	#NULL!	#NULL!	#NULL!	5.68	8.97	8.97	278.6	3.25	16.71	0.068	5.04	1.38	1.16	3.01	3	1	1	1	0	1	1
30.3861	48	0.333	117	81	55	1.7	19.0311	82	89	0.921348	11.77	18.8	18.8	6.98	1.98	2.53	#NULL!	4.05	2.21	0.85	2.15	1	1	1	0	1	0	0
25.4341	58	10	117	81	75	1.73	25.0593	92	99	0.929293	10.32	12.98	12.98	32.11	3.05	5.29	0.078	5.32	2.25	0.89	3.4	1	1	1	1	1	0	1
29.7962	38	2	142	103	84	1.71	28.7268	100	102	0.980392	7.3	11.96	11.96	31.87	3.94	7.61	0.106	5.84	3.28	0.92	3.47	1	1	1	1	1	0	1
300.676	67	12	129	79	49	1.6	19.1406	70	86	0.813953	11.82	26.91	26.91	12.28	1.32	3.37	0.136	4.55	0.75	1.42	2.63	3	1	0	1	0	1	1
33.8082	72	20	191	100	66	1.68	23.3844	84	95	0.884211	11.32	10.08	10.08	16.14	2.35	2.38	0.088	5.59	1.4	1.61	3.43	2	1	1	1	0	1	1
31.9044	44	0.5	108	75	58	1.53	24.7768	#NULL!	#NULL!	#NULL!	5.45	13.55	13.55	23.84	1.98	5.64	0.063	4.61	1.3	1.07	3.15	2	2	1	1	0	1	1
263.679	44	6	103	72	74.5	1.68	26.396	81	91	0.89011	7.84	12.3	12.3	79.89	2.86	5.72	0.104	5.83	1.44	1.25	3.88	3	1	1	1	0	1	1
32.5291	63	9	139	84	65	1.63	24.4646	94	102	0.921569	5.71	7.04	7.04	25.55	1.85	4.38	0.072	5.04	1.13	1.9	2.65	2	2	1	1	0	1	1
31.2897	48	1	125	83	74	1.67	26.5338	92	98	0.938776	11.14	13.94	13.94	14.25	1.58	3.84	0.106	3.78	2.79	0.8	2.08	1	1	1	0	1	0	0
29.7962	70	17	105	61	70	1.7	24.2215	91	100	0.91	6.03	6.98	6.98	12.99	1.81	2.28	0.063	4.04	1	1.25	2.41	1	1	1	0	0	1	0
36.1423	48	11	149	101	74.5	1.68	26.396	94	99	0.949495	21.52	30.61	30.61	144.2	4.28	8.9	0.137	3.98	5.86	0.82	1.65	2	1	1	0	1	0	0
32.8452	44	10	138	84	73	1.79	22.7833	88	98	0.897959	15	15.76	15.76	29.74	2.05	2.67	0.115	8.52	13.19	0.88	2.92	2	1	1	1	1	0	1
38.2397	49	3	139	101	75	1.7	25.9516	95	100	0.95	10.98	19.92	19.92	36.64	2.49	4.72	0.102	8.13	18.81	0.76	2.4	3	1	1	1	1	0	0
