# Supplementary material for: Association of serum Metrnl levels and high-density lipoprotein cholesterol in patients with type 2 diabetes mellitus: a cross-sectional study
Source: PeerJ. 2024 Oct 14;12:e18264. doi: 10.7717/peerj.18264 (PMC11485050; doi:10.7717/peerj.18264)
Supplement: Supplemental Information 3 — Clinical indicators of each patient are presented in the table, including adiponectin, mean artery pressure, TC:HDL ratio, QUICKI, FPG, FINS. [file peerj-12-18264-s003.xlsx]

## Sheet: raw data of metrnl
metrnl concentration	Adiponectin	MAP(Mean arterial Pressure)	TC/HDL(quantitative insulin-sensitivity check index)ratio	QUICKI(quantitative insulin-sensitivity check index)	FPG(fasting plasma glucose)	FINS(fasting insulin)
35.1271	22.8376	87.67	0.92	0.484149	7.56	15.38
25.9446	22.3855	95.67	1.63	0.562328	11.61	5.17
40.7996	23.5496	111	1.14	0.483688	9.45	12.36
27.2643	17.9477	90.33	0.69	0.678682	9.85	3.02
33.1637	22.6544	96.33	1.59	0.600594	11.56	4
37.5307	23.2837	122.67	2.54	0.474128	8.21	15.66
39.6876	26.7524	112.67	0.59	0.683372	9.56	3.04
203.1	66.6809	94.67	0.76	0.577972	5.46	9.84
40.0558	17.2504	121.67	1.26	0.805157	8.6	2.03
25.1825	22.1462	81.33		0.606153	12.54	3.56
24.6869	15.8824	95	1.77	0.429557	6.76	31.48
27.8096	20.9112	98.33	1.3	0.614005	7.22	5.89
30.986	21.5937	107.33	1.36	0.456495	8.55	18.14
36.1423	24.1405	99	0.63	0.640755	5.1	7.13
47.5228	19.6555	97.67	1.06	0.502678	8.72	11.19
32.5291	29.6154	84.67	0.93	1.17805	14.41	0.49
315.205	26.259	77.33	0.76	0.84778	7.2	2.1
34.1342	91.3991	82.67	0.55	0.639369	5.93	6.18
42.317	21.1771	98.33	0.66	0.743532	8.35	2.65
50.4997	27.757	95.67	0.63	0.452071	9.18	17.75
31.5958	27.494	99.33	1.25	0.534907	6.01	12.32
32.8452	21.4696	110.33	3.66	0.500555	9.02	11.03
26.2036	23.8037	93.33	0.69	0.554805	6.83	9.29
32.5291	22.616	103	1.67	0.586263	5.14	9.88
30.986	22.9055	86.67	0.72	1.33427	5.06	1.11
31.2897	24.764	104	0.82	0.842633	5.51	2.79
41.1753	24.9944	82	8.49	0.576374	10.61	5.12
41.934	25.8365	127.33	3.49	0.514842	10.29	8.51
44.6676	24.0371	89	4.63	0.499308	5.92	17
25.4341	27.7215	86.33	4.38	0.519493	7.87	10.69
82.7637	19.9539	99	3.75	0.376184	11.94	38.13
225.095	57.3798	70.67	0.37	0.680634	8.9	3.31
40.0558	90.8879	102.33		0.53372	5.99	12.48
34.1342	28.9979	108.33	13.45	0.585772	17.63	2.89
38.2397	20.6837	80	8.67	0.362988	34.49	16.49
378.241	26.8558	92.67	1.92	0.790639	8.72	2.11
37.5307	84.7423	80.67	2.65	0.543671	21.93	3.15
37.884	29.5209	110.67	5.57	0.492647	9.274	11.55
30.0899	28.9595	107.33	6.66	0.521273	8.65	9.58
33.1637	31.3261	118.33	19.85	0.426798	13.2	16.69
33.4847	27.8811	92.67	1.58	1.70119	7.9	0.49
30.986	25.9251	86.67	3.8	0.523001	11.47	7.12
53.5981	22.7726	85	3.8	0.621958	13.29	3.05
49.6367	28.404	98	8.64	0.492214	11.43	9.41
28.6461	29.9907	110	0.39	0.873697	7.42	1.88
43.0906	26.6667	95.67	31.44	0.544774	12.59	5.44
30.6848	26.974	86.33	0.62	1.20198	4.62	1.47
31.5958	30.5225	104.67	3.05	0.613777	10.02	4.25
19.8901	26.6342	88.67	2.84	0.590383	13.5	3.66
30.6848	15.6283	92.33	4.54	0.420433	13.37	17.88
35.463	25.931	83.33	22.42	0.534195	10.3	7.23
35.463	29.1811	104.67	1.26	#NUM!	7.31
33.1637	30.3984	90.33	0.74	0.598747	10.61	4.41
32.8452	27.1808	103.33	1.91	0.574734	6.62	8.3
30.0899	30.9184	85	0.92	#NUM!	13.59
28.6461	30.7175	101.33	1.2	0.45848	5.28	28.74
36.1423	23.4108	85.33	9.56	0.593266	10.75	4.51
346.622	29.6597	109	1.2	0.523676	8.04	10.1
35.1271	92.9118	101.67	0.23	0.748946	7.31	2.96
31.2897	28.1647	94.33	0.25	0.918817	6.19	1.98
29.7962	28.9063	115.33	2.91	0.529366	6.46	11.99
30.0899	29.5091	89	9.04	0.4831	8.9	13.2
28.6461	33.0014	89	4.51	#NUM!	9.87
31.2897	31.9968	115.33	2.01	#NUM!	8.7
45.8764	22.2496	98.33	0.97	0.506755	9.49	9.91
34.1342	27.0508	83.67	0.97	0.802795	6.05	2.91
127.884	28.4661	101.67	0.96	0.790828	5.64	3.26
30.3861	74.936	115.67	1.19	0.483657	5.68	20.57
25.4341	29.8163	93	2.6	0.660827	11.77	2.77
29.7962	31.3705	93	2.53	0.470378	10.32	12.95
300.676	32.4164	116	3.57	0.536926	7.3	9.98
33.8082	97.5446	95.67	0.53	0.879449	11.82	1.16
31.9044	22.873	130.33	0.87	0.491022	11.32	9.61
263.679	21.4932	86	1.21	0.586231	5.45	9.32
32.5291	29.7543	82.33	1.15	0.502996	7.84	12.41
31.2897	27.7422	102.33	0.59	0.643541	5.71	6.27
29.7962	28.4247	97	3.49	0.6247	11.14	3.58
36.1423	29.6952	75.67	0.8	0.669807	6.03	5.16
32.8452	28.7202	117	7.15	0.324994	21.52	55.48
38.2397	31.8521	102	14.99	0.547235	15	4.48
