# Supplementary material for: Association of serum Metrnl levels and high-density lipoprotein cholesterol in patients with type 2 diabetes mellitus: a cross-sectional study
Source: PeerJ. 2024 Oct 14;12:e18264. doi: 10.7717/peerj.18264 (PMC11485050; doi:10.7717/peerj.18264)
Supplement: Supplemental Information 4 [file peerj-12-18264-s004.xlsx]

## Sheet: Sheet1
	code
items	0	1	2	3
tertiles of metrnl		metrnl＜37.290ng/mL	31.290≤Metrnl≤37.776ng/mL	Metrnl＞37.776ng/mL
sex（male 1，female2）		male	female
HOMAIR_A	HOMAIR＜1	HOMAIR≥1
TC_A	TC＜5.2mmol/L	TC≥5.2mmol/L
TG_A	TG＜1.7mmol/L	TG≥1.7mmol/L
HDL_A	HDL＜1.04mmol/L	HDL≥1.04mmol/L
LDL_A	LDL＜2.6mmol/L	LDL≥2.6mmol/L

## Sheet: Sheet2
	code
items	0	1	2	3
tertiles of metrnl		＜37.290ng/mL	31.290~37.776ng/mL	＞37.776ng/mL
sex（male 1，female2）		male	female
BMI_A	≤24	24~28	≥28
WHR_A	＜1	≥1
blood glucose_A	＜7	≥7
HOMAIR_A	＜1	≥1
HbA1c_A
TC	0-5.2mmol/L	≥5.2mmol/L
TG	0-1.7	≥1.7mmol/L
HDL（0：小于1.04）	0-1.04mmol/L	≥1.04mmol/L
LDL	0-2.6mmol/L	≥2.6mmol/L
